# Supplementary material for: Enhanced diagnostic workup increases pathological findings in patients with acute ischaemic stroke: results of the prospective HEBRAS study
Source: HighWire-hosted journal article supplement (doi:10.1136/svn-2022-002179), 2023-06-23
Supplement: svn-2022-002179supp001_data_supplement.pdf [file svn-2022-002179supp001_data_supplement.pdf]

## Supplemental Online Content

### Enhanced diagnostic work-up increases pathological findings in patients with acute ischaemic stroke – Results of the prospective HEBRAS study

#### Supplemental Methods

##### *Inclusion and exclusion criteria of the HEBRAS study:*

##### Inclusion criteria

- Written informed consent by patient
- Age  $\geq$  18 years.
- Acute ischaemic stroke (with matching brain lesion on MR imaging).
- Admission to the stroke unit at the Charité, Campus Benjamin Franklin
- Enrolment within 144 h after onset of stroke-related symptoms.

##### Exclusion criteria

- Known AF by past medical history before hospital admission.
- Atrial fibrillation (AF) according to 12-lead ECG on hospital admission.
- AF according to inpatient ECG recording / stroke unit monitoring before enrolment.
- Pre-stroke life expectancy less than 1 year.
- Participation in an interventional study.
- Pregnancy and / or breast-feeding.
- Contraindications to undergo MRI (i.e., mechanic heart valve, cardiac pacemaker) • History of adverse response to MRI contrast agents
- Clinically severe heart failure (NYHA III-IV)
- Renal insufficiency (creatinine  $>$  1.3 mg/dl (females); creatinine  $>$  1.7 mg/dl (males))

### ***Magnetic resonance imaging***

All examinations were performed on a 3 Tesla MR scanner (MAGNETOM® TIM TRIO, Siemens, Erlangen, Germany) *Brain MRI* consisted of a T2\*-sensitive sequence (repetition time (TR) 620 ms, echo time (TE) 20 ms, flip angle 20°, field-of-view (FOV) 220 mm, slice thickness (ST) 5 mm) to exclude intracerebral haemorrhage, a diffusion weighted (DWI) sequence (TR 7600 ms, TE 93 ms, FOV 230 mm, ST 2.5 mm) for detection of ischemic tissue, and a 3D time-of-flight (TOF) angiographic sequence (TR 22 ms, TE 3.86 ms, flip angle 18°, FOV 200 mm, ST 0.65 mm) for imaging of intracranial vessels and a fluid-attenuated inversion recovery (FLAIR) sequence (TR 8000 ms, TE 96 ms, FOV 220 mm, ST 5 mm) for the detection of chronic infarction.

*Cardiac MRI* was performed using ECG and pulse triggering. Localization and planning were based on a dark-blood-prepared HASTE sequence (half-Fourier acquisition single-shot turbo spin-echo) with the following parameters: TR 750 ms, TE 49 ms, Flip angle 160°, ST 5 mm, FOV/matrix. Two chamber, three chamber and four chamber view were acquired using double-oblique cine SSFP (steady state free precession) sequence (TR 40.56 ms, TE 1.48 ms, flip angle 50°, slice thickness 5 mm) with prior scouting for individual frequency adjustment. Short axis examinations of the left ventricle were obtained parallel to the atrioventricular plane with prior individual frequency adjustment (TR 40.32 ms, TE 1.48 ms, flip angle 50°, matrix size 256x216 pixel, ST 8 mm (2 mm interslice gap)). Integrated parallel imaging techniques (iPAT) with two-fold acceleration were used for short axis stack acquisition. Following standard k-space segmented SSFP imaging, a fast SSFP real-time sequence (CRT) was used for short axis cine imaging (TR 48.6 ms, TE 1.21 ms flip angle 55°, matrix size 128x54 pixel, ST 8 mm (2 mm interslice gap) with three-fold acceleration (iPAT). ECG triggering was performed every second heartbeat to capture the entire diastole. Post-contrast imaging is performed after intravenous injection of 0.1 mmol/kg body weight Gadobutrol (Gadovist®, Bayer Schering Pharma, Berlin, Germany) with post-contrast cine imaging parameters held constant. For angiographic imaging

of the aortic arch as well as extracranial cerebral arteries, a three-dimensional TWIST (Time-resolved angiography With Interleaved Stochastic Trajectories) sequence was used (TR 2.36 ms, TE 0.99 ms, Flip angle 20°, ST 1.40 mm). Finally, myocardial late enhancement is characterized employing a turbo FLASH (Fast Low Angle SHot) sequence (TR 750.00 ms, TE 1.97 ms, Flip angle 20°, ST 8 mm).

### ***Assessment of systolic cardiac function***

To determine systolic cardiac function, left ventricular ejection fraction (LVEF) was determined based on TTE or CMR. In case of TTE, biplane method of disks (modified Simpson's rule) was used to determine LVEF according to guideline recommendations<sup>22</sup>. In case of CMR, LVEF was derived from volume-time-curves generated by delineating endocardial contours of the left ventricle in each short axis stack whenever possible or using enddiastolic and endsystolic volumes on long axis four chamber views<sup>15</sup>. As it is regarded to be the gold standard for LVEF estimation, CMR-derived LVEF was used for analysis whenever available<sup>23</sup>. CMR analysis was performed on cvi42<sup>®</sup> software (Circle Cardiovascular Imaging Inc., Calgary, Canada).

### ***Detailed description of stroke aetiology after routine work-up***

Analysing all 356 patients after routine clinical work-up, aetiology of AIS was categorized as "large-artery atherosclerosis" in 70 (19.7%) patients. Fifteen (4.2%) patients were categorized as "cardioembolic" (for the following reasons: newly detected atrial fibrillation (n=5), akinetic left ventricular segment (n=6), bioprosthetic aortic valve (n=2), paradoxical embolism (patent foramen ovale and deep venous thrombosis) (n=1) and systolic dysfunction (LVEF = 35%; n=1).

With regard to small-artery occlusion, 85 patients (23.9%) presented with a subcortical infarct with a diameter <2 cm on DWI imaging and a corresponding lacunar syndrome. A total of ten patients (2.8%) was found to have another determined aetiology.

Fourteen patients (3.9%) presented with competing aetiologies (lacunar syndrome with DWI lesion <2 cm and ipsilateral stenosis >50% or occlusion n=11, lacunar syndrome with DWI lesion <2 cm and aortic plaque of 7 mm (TEE) n=1 and ipsilateral stenosis >50% and concomitant atrial fibrillation n=2).

The remaining 162 patients (45.5%) were classified as “cryptogenic”. Of those, 45 (12.6%) patients did not receive echocardiography in clinical routine (therefore labelled as “cryptogenic because of incomplete workup”).

#### ***Comparison of baseline characteristics in patients with and without echocardiography***

Comparison of study participants who received echocardiography with those who did not revealed that patients not undergoing echocardiography were older, more often severely affected and more dependent on the help of others on hospital admission, suffered more frequently from hypertension, were discharged earlier, and were more often on ACE inhibitors (**supplemental table 1**).

#### ***Reasons not to undergo CMR and comparison of baseline characteristics in these patients***

In our study, 42 patients (11.8%) refused to undergo the CMR examination after enrolment, 11 patients (3.1%) were discharged prior to planned CMR, three patients (0.8%) were unable to follow breath-hold commands, three patients (0.8%) suffered worsening of the symptoms which precluded the examination, two patients (0.6%) had claustrophobia, two patients (0.6%) were unable to undergo CMR because of severe adipositas, and one patient (0.3%) suffered a panic attack immediately prior to the examination.

Comparing patient groups with and without CMR revealed that patients who did not undergo CMR were older, more often female, more often severely affected and more dependent on the help of others on hospital admission, suffered more frequently from hypertension and less likely from hypercholesterolemia (**supplemental table 2**).

### Supplemental Figure 1

Detailed depiction of changes in aetiological classification after routine diagnostic work-up and after enhanced diagnostic work-up, resulting in competing aetiologies (A), cardioembolic (B) or large-artery atherosclerosis (B).

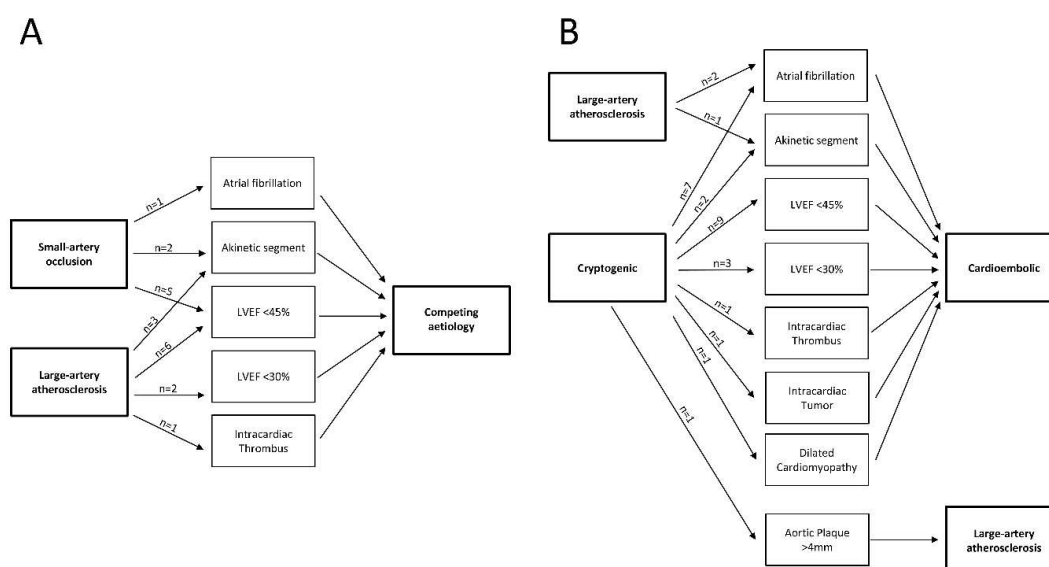

LVEF, left ventricular ejection fraction

**Supplemental Table 1** – Baseline characteristics of all 356 HEBRAS patients and the subgroup of 228 AIS patients who received echocardiography (TTE and/or TEE) and the subgroup of 128 patients who did not receive echocardiography. Data are given as mean (STD), median [IQR] or n (%).

|                                     | <b>Whole cohort (n=356)</b> | <b>Echocardiography (n=228)</b> | <b>No echocardiography (n=128)</b> | <b>p</b> |
|-------------------------------------|-----------------------------|---------------------------------|------------------------------------|----------|
| Female sex                          | 134 (37.6)                  | 86 (37.7)                       | 48 (37.5)                          | 0.967    |
| Age (years)                         | 66 (12)                     | 64 (13)                         | 71 (9)                             | <0.001   |
| Length of in-hospital stay (days)   | 5 [4-6]                     | 5 [4-6]                         | 4 [3-6]                            | 0.032    |
| NIHSS on admission (points)         | 2 [1-4]                     | 2 [0-3]                         | 2 [1-4]                            | 0.002    |
| mRS on admission (points)           | 2 [1-3]                     | 2 [1-3]                         | 2 [1-3]                            | 0.008    |
| Barthel Index on admission (points) | 100 [75-100]                | 100 [80-100]                    | 90 [70-100]                        | 0.005    |
| Intravenous thrombolysis            | 66 (18.5)                   | 45 (19.7)                       | 21 (16.4)                          | 0.438    |
| Diabetes mellitus                   | 65 (18.3)                   | 41 (18.0)                       | 24 (18.8)                          | 0.857    |
| Arterial hypertension               | 212 (59.6)                  | 123 (53.9)                      | 89 (69.5)                          | 0.004    |
| High blood lipids                   | 125 (35.1)                  | 77 (33.8)                       | 48 (37.5)                          | 0.479    |
| Current tobacco use                 | 96 (27.0)                   | 60 (26.3)                       | 36 (28.1)                          | 0.712    |
| Previous ischaemic stroke or TIA    | 58 (16.3)                   | 32 (14.0)                       | 26 (20.3)                          | 0.124    |
| Coronary artery disease             | 42 (11.8)                   | 27 (11.8)                       | 15 (11.7)                          | 0.972    |

|                                                 |            |           |           |       |
|-------------------------------------------------|------------|-----------|-----------|-------|
| Prior myocardial infarction                     | 31 (8.7)   | 17 (7.5)  | 14 (10.9) | 0.264 |
| Chronic heart failure                           | 7 (2.0)    | 3 (1.3)   | 4 (3.1)   | 0.238 |
| Oral anticoagulation on admission*              | 6 (1.7)    | 4 (1.8)   | 2 (1.6)   | 0.893 |
| Antiplatelet(s) on admission                    | 114 (32.0) | 69 (30.3) | 45 (35.2) | 0.342 |
| Acetylsalicylic acid (ASA)                      | 97 (27.2)  | 60 (26.3) | 37 (28.9) |       |
| Clopidogrel                                     | 11 (3.1)   | 6 (2.6)   | 5 (3.9)   |       |
| Dual antiplatelets                              | 6 (1.7)    | 3 (1.3)   | 3 (2.3)   |       |
| Beta blocker on admission                       | 100 (28.1) | 60 (26.3) | 40 (31.3) | 0.320 |
| ACE inhibitor on admission                      | 64 (18.0)  | 34 (14.9) | 30 (23.4) | 0.044 |
| Angiotensin II receptor antagonist on admission | 73 (20.5)  | 43 (18.9) | 30 (23.4) | 0.305 |
| Calcium channel blocker on admission            | 65 (18.3)  | 38 (16.7) | 27 (21.1) | 0.299 |
| Statin on admission                             | 98 (27.5)  | 60 (26.3) | 38 (29.7) | 0.494 |

AIS, Acute ischemic stroke; TTE, transthoracic echocardiography; TEE, transesophageal echocardiography; STD, Standard deviation; IQR, Interquartile range; NIHSS, National Institutes of Health Stroke Scale; mRS, modified Rankin scale; TIA, transient ischemic attack; ACE, angiotensin converting enzyme

**Supplemental Table 2** – Baseline characteristics of all 356 HEBRAS patients and the subgroup of 292 AIS patients who received cardiovascular MRI (CMR) and the subgroup of 64 patients who did not receive CMR. Data are given as mean (STD), median [IQR] or n (%).

|                                        | <b>Whole cohort<br/>(n=356)</b> | <b>CMR<br/>(n=292)</b> | <b>No CMR<br/>(n=64)</b> | <b>p</b> |
|----------------------------------------|---------------------------------|------------------------|--------------------------|----------|
| Female sex                             | 134 (37.6)                      | 103 (35.3)             | 31 (48.4)                | 0.049    |
| Age (years)                            | 66 (12)                         | 65 (12)                | 70 (12)                  | 0.003    |
| Length of in-hospital stay<br>(days)   | 5 [4-6]                         | 5 [4-6]                | 5 [3-6]                  | 0.891    |
| NIHSS on admission<br>(points)         | 2 [1-4]                         | 2 [1-3]                | 3 [2-4]                  | 0.004    |
| mRS on admission                       | 2 [1-3]                         | 2 [1-3]                | 2 [1-3]                  | 0.004    |
| Barthel Index on admission<br>(points) | 100 [75-100]                    | 100 [80-100]           | 90 [70-100]              | 0.008    |
| Intravenous thrombolysis               | 66 (18.5)                       | 53 (18.2)              | 13 (20.3)                | 0.687    |
| Diabetes mellitus                      | 65 (18.3)                       | 52 (17.8)              | 13 (20.3)                | 0.639    |
| Arterial hypertension                  | 212 (59.6)                      | 164 (56.2)             | 48 (75.0)                | 0.005    |
| High blood lipids                      | 125 (35.1)                      | 110 (37.7)             | 15 (23.4)                | 0.031    |
| Current tobacco use                    | 96 (27.0)                       | 77 (26.4)              | 19 (29.7)                | 0.588    |
| Previous ischaemic stroke<br>or TIA    | 58 (16.3)                       | 47 (16.1)              | 11 (17.2)                | 0.830    |
| Coronary artery disease                | 42 (11.8)                       | 38 (13.0)              | 4 (6.3)                  | 0.129    |
| Prior myocardial infarction            | 31 (8.7)                        | 28 (9.6)               | 3 (4.7)                  | 0.208    |
| Chronic heart failure                  | 7 (2.0)                         | 6 (2.1)                | 1 (1.6)                  | 0.797    |



|                                                 |            |           |           |       |
|-------------------------------------------------|------------|-----------|-----------|-------|
| Oral anticoagulation on admission*              | 6 (1.7)    | 4 (1.4)   | 2 (3.1)   | 0.323 |
| Antiplatelet(s) on admission                    | 114 (32.0) | 95 (32.5) | 19 (29.7) | 0.658 |
| Acetylsalicylic acid (ASA)                      | 97 (27.2)  | 79 (27.1) | 18 (28.1) |       |
| Clopidogrel                                     | 11 (3.1)   | 10 (3.4)  | 1 (1.6)   |       |
| Dual antiplatelets                              | 6 (1.7)    | 6 (2.1)   | -         |       |
| Beta blocker on admission                       | 100 (28.1) | 78 (26.7) | 22 (34.4) | 0.217 |
| ACE inhibitor on admission                      | 64 (18.0)  | 49 (16.8) | 15 (23.4) | 0.209 |
| Angiotensin II receptor antagonist on admission | 73 (20.5)  | 63 (21.6) | 10 (15.6) | 0.286 |
| Calcium channel blocker on admission            | 65 (18.3)  | 53 (18.2) | 12 (18.8) | 0.911 |
| Statin on admission                             | 98 (27.5)  | 81 (27.7) | 17 (26.6) | 0.849 |

AIS, Acute ischemic stroke; STD, Standard deviation; IQR, Interquartile range; NIHSS, National Institutes of Health Stroke Scale; mRS, modified Rankin scale; TIA, transient ischemic attack; ACE, angiotensin converting enzyme

**Supplemental Table 3** – Detailed description of the pathological findings detected by CMR defined as relevant for stroke aetiology a priori per study protocol of the HEBRAS trial. CMR detected 60 pathological findings in 47 patients (LVEF<45%: n=40 [LVEF<30%: n=8]; at least on akinetic myocardial segment: n=14; intraventricular thrombus: n=3; dilated cardiomyopathy: n=2; intracardiac tumour: n=1).

| Study ID | Major risk cardioembolic source detected by CMR                                                                  |
|----------|------------------------------------------------------------------------------------------------------------------|
| H003     | Ischemic LGE, WMA, <u>LVEF=33%</u>                                                                               |
| H007     | <u>LVEF=33%</u>                                                                                                  |
| H016     | Ischemic LGE, WMA. Transmural chronic MI with hypo-/dyskinesia. Left ventricular <u>thrombus</u> in apex.        |
| H018     | <u>LVEF=43%</u>                                                                                                  |
| H022     | Ischemic LGE. Chronic MI RIVA / Apex. <u>Akinesia</u> . 13 mm intraventricular <u>thrombus</u> . <u>LVEF=41%</u> |
| H023     | <u>LVEF=43%</u>                                                                                                  |
| H029     | Chronic, non-transmural MI with hypokinesia. <u>LVEF=42%</u>                                                     |
| H035     | <u>LVEF=30%</u>                                                                                                  |
| H045     | <u>LVEF=36%</u>                                                                                                  |
| H061     | Ischemic LGE; transmural chronic MI with lateral hypo- <u>akinesia</u> . <u>LVEF=25%</u>                         |
| H075     | Global hypokinesia. <u>LVEF=41%</u>                                                                              |
| H086     | Transmural wall thinning with <u>akinesia</u> .                                                                  |
| H112     | <u>LVEF=38%</u>                                                                                                  |
| H119     | Chronic MI anterior wall / septum. Apical aneurysm with <u>thrombus</u> .<br>Ischemic LGE. <u>LVEF=40%</u>       |
| H128     | Transmural chronic MI apical / inferior with dyskinesia. <u>LVEF=41%</u>                                         |

|      |                                                                                                                                                          |
|------|----------------------------------------------------------------------------------------------------------------------------------------------------------|
| H146 | Ischemic LGE. Inferolateral chronic MI with <u>akinesia</u> . <u>LVEF=44%</u>                                                                            |
| H147 | <u>LVEF=30%</u>                                                                                                                                          |
| H159 | Ischemic LGE. Almost transmural chronic MI; wall thinning, <u>akinetic</u> myocardium. Batrial dilatation.                                               |
| H162 | <u>Dilated cardiomyopathy</u> with severely impaired LVEF ( <u>LVEF=14%</u> ). Diffuse hypokinesia with septal <u>akinesia</u> . Left atrial dilatation. |
| H165 | Ischemic LGE. Chronic MI with wall thinning. Septal-basal to midventricular <u>akinesia</u> . <u>LVEF=31%</u>                                            |
| H185 | <u>LVEF=35%</u>                                                                                                                                          |
| H189 | <u>LVEF=21%</u>                                                                                                                                          |
| H196 | Ischemic LGE; Basal-septal chronic MI. <u>LVEF=15%</u>                                                                                                   |
| H197 | Ischemic LGE; Transmural chronic MI inferolateral with hypokinesia. <u>LVEF=36%</u>                                                                      |
| H207 | Concentric left ventricular hypertrophy; Biventricular <u>lipoma</u> .                                                                                   |
| H215 | Non-ischemic LGE; <u>LVEF=41%</u>                                                                                                                        |
| H216 | Ischemic LGE; chronic MI with septal hypokinesia. <u>LVEF=39%</u>                                                                                        |
| H255 | Ischemic LGE; lateral-basal chronic MI with <u>akinesia</u> .                                                                                            |
| H258 | <u>LVEF=44%</u>                                                                                                                                          |
| H260 | <u>LVEF=44%</u>                                                                                                                                          |
| H264 | <u>LVEF=42%</u>                                                                                                                                          |
| H267 | Non-ischemic LGE inferolateral/septal. <u>Dilated cardiomyopathy</u> . Left ventricular hypertrophy, borderline mitral valve prolapse. <u>LVEF=38%</u>   |
| H273 | Marked biatrial dilatation. <u>LVEF=37%</u>                                                                                                              |
| H288 | Ischemic LGE; chronic MI with hypokinesia anterior, anterolateral and inferolateral. <u>LVEF=17%</u>                                                     |

|      |                                                                                                                                                                            |
|------|----------------------------------------------------------------------------------------------------------------------------------------------------------------------------|
| H290 | Ischemic LGE; transmural chronic MI with septal and apical <u>akinesia</u> .                                                                                               |
| H298 | <u>LVEF=20%</u>                                                                                                                                                            |
| H306 | Ischemic LGE; right atrial dilatation. <u>LVEF=40%</u>                                                                                                                     |
| H307 | Ischemic LGE; <u>Akinesia</u> apical inferior wall and apex.                                                                                                               |
| H318 | Ischemic LGE; circumscript scarring left ventricular outflow tract DD infarction DD non-compaction cardiomyopathy. <u>LVEF=41%</u>                                         |
| H328 | Ischemic LGE; inferior wall <u>akinesia</u> . <u>LVEF=38%</u>                                                                                                              |
| H329 | Ischemic LGE; left atrial and left ventricular dilatation. Non-transmural chronic MI; inferolateral hypokinesia. Non-ischemic fibrosis septal basal. <u>LVEF=36%</u>       |
| H330 | <u>LVEF=43%</u>                                                                                                                                                            |
| H339 | Chronic MI with <u>akinesia</u> inferior / inferolateral wall basal to midventricular. <u>LVEF=39%</u> .                                                                   |
| H345 | <u>LVEF=42%</u>                                                                                                                                                            |
| H360 | Ischemic LGE; 50% transmural chronic MI inferolateral wall. Global hypo- <u>akinesia</u> of the left ventricle. <u>LVEF=16%</u> . Suspected non-compaction cardiomyopathy. |
| H363 | Apical to lateral hypo- <u>akinesia</u> . Chronic MI inferolateral wall basal to midventricular. <u>LVEF=28%</u> .                                                         |
| H368 | Gross vegetations of the mitral valve with mitral valve prolapse and regurgitant jet. <u>LVEF=40%</u> . (Endocarditis was not confirmed on TEE).                           |

LGE, late gadolinium enhancement; WMA, wall motion abnormalities; LVEF, left ventricular ejection fraction; MI, myocardial infarction; RIVA, ramus interventricularis anterior
